1 Research article

2 **Evolution of assortative mating following selective introgression of**  
3 **pigmentation genes between two *Drosophila* species**

4 Jean R. David<sup>1,\*</sup>, Erina A. Ferreira<sup>1</sup>, Laure Jabaud<sup>1</sup>, David Ogereau<sup>1</sup>, H elo ise  
5 Bastide<sup>1</sup> and Amir Yassin<sup>1,\*\*</sup>

6

7 <sup>1</sup>Laboratoire  volution, G nomes, Comportement et  cologie, CNRS, IRD,  
8 Universit  Paris-Saclay, av. de la Terrasse, 91198 Gif-sur-Yvette Cedex, France.

9 \*Deceased in 2021.

10 \*\*Corresponding author: [amir.yassin@egce.cnrs-gif.fr](mailto:amir.yassin@egce.cnrs-gif.fr)

11

12 Running title: Experimental speciation in *Drosophila*

13 **Abstract**

14 Adaptive introgression is ubiquitous in animals but experimental support for its role in  
15 driving speciation remains scarce. In the absence of conscious selection, admixed  
16 laboratory strains of *Drosophila* asymmetrically and progressively lose alleles from  
17 one parental species and reproductive isolation against the predominant parent  
18 ceases after 10 generations. Here, we selectively introgressed during one year light  
19 pigmentation genes of *D. santomea* into the genome of its dark sibling *D. yakuba*,  
20 and vice versa. We found that the pace of phenotypic change differed between the  
21 species and the sexes, and identified through genome sequencing common as well  
22 as distinct introgressed loci in each species. Mating assays showed that assortative  
23 mating between introgressed flies and both parental species persisted even after four  
24 years (~ 60 generations) from the end of the selection. Those results indicate that  
25 selective introgression of as low as 0.5% of the genome can beget morphologically-  
26 distinct and reproductively-isolated strains, two prerequisites for the delimitation of  
27 new species. Our findings hence represent a significant step towards understanding  
28 the genome-wide dynamics of speciation-through-introgression.

29

30 **Keywords:** experimental speciation; hybridization; pigmentation; mate choice;  
31 genome mapping.

## 32 Introduction

33 In sexually reproducing organisms, speciation begins when extrinsic or intrinsic  
34 barriers significantly reduce gene flow between populations and ends with the  
35 evolution of pervasive phenotypic differences delimiting the nascent species (Coyne  
36 and Orr 2004; The Marie Curie SPECIATION Network 2012; Kulmuni et al. 2020).  
37 The pace of this process can be dramatically accelerated if the diagnostic characters  
38 also contribute, either directly or through genetic linkage, to reproductive isolation.  
39 The search for such traits, which were dubbed ‘magic’, has been a ‘holy grail’ in  
40 speciation genetics (Servedio et al. 2011; Smadja and Butlin 2011; Thibert-Plante  
41 and Gavrillets 2013; Martin and Richards 2019). However, how such traits form is  
42 enigmatic, and theory predicts that substantial degrees of geographical isolation and  
43 long times of divergence are necessary for the build-up of genetic barriers to  
44 reproduction (Richards et al. 2019). Therefore, it has been argued that adaptive  
45 introgression, *i.e.* the exchange of beneficial alleles between species with  
46 intermediate levels of reproductive isolation (Hedrick 2013), could significantly  
47 shorten the time of speciation. Introduced alleles could epistatically interact with the  
48 host genome leading to the rapid formation of populations that are phenotypically  
49 distinct and reproductively isolated from the parental species (Abbott et al. 2013;  
50 Schumer et al. 2014; Payseur and Rieseberg 2016; Richards et al. 2019). In spite of  
51 the growing evidence for the ubiquity of interspecific gene flow unraveled by recent  
52 comparative genomic studies in plants and animals (Lamichhaney et al. 2015;  
53 Racimo et al. 2015; Leducq et al. 2016; Pease et al. 2016; Schumer et al. 2018;  
54 Edelman et al. 2019), experimental tests for the role of adaptive introgression in the  
55 evolution of reproductive barriers are rare. Indeed, two recent reviews on  
56 experimental speciation had barely addressed the question of adaptive introgression  
57 (Fry 2009; White et al. 2020).

58 For nearly 100 years, *Drosophila* species have been a primary model for the  
59 experimental study of speciation (Mallet 2006; Castillo and Barbash 2017).  
60 Introgression between species with incomplete reproductive isolation has long been  
61 used to identify the quantitative trait loci (QTL) responsible for phenotypic differences  
62 and reproductive barriers (e.g., Tanaka et al. 2015; Ding et al. 2016; Shahandeh and  
63 Turner 2020; Massey et al. 2021). In those experiments, two species are crossed  
64 and their fertile F<sub>1</sub> hybrid females are backcrossed to one parental species for one or  
65 a few generations. Introgressed genomic regions are then assessed using molecular

66 markers and isogenic lines are produced via inbreeding to test for the statistical  
67 association with the phenotype of interest. Such short-term introgression does not  
68 inform us much on how introgression can lead to the origin of new species. Indeed,  
69 whereas  $F_1$  hybrid males are sterile, a proportion of males issued from the first  
70 backcross are often fertile. When those males are left to mate with the backcross  
71 females, the proportion of sterile males progressively diminish each generation. In  
72 the absence of conscious selection on a particular introgressed phenotype, alleles  
73 from one parent, usually the one that was not used in the backcross, are gradually  
74 purged out in less than 20 generations (David et al. 1976; Amlou et al. 1997; Matute  
75 et al. 2020). Contrary to those experimental observations, comparative genomics  
76 have unraveled strong evidence for genetic introgression between many *Drosophila*  
77 species pairs (Lohse et al. 2015; Turissini and Matute 2017; Schridder et al. 2018; Mai  
78 et al. 2020), with the traces of introgression sometimes persisting for millions of years  
79 (Suvorov et al. 2021).

80 To test for the effect of adaptive introgression on speciation, one should  
81 identify an easily measurable phenotype distinguishing a pair of species, deliberately  
82 select it in backcross flies for several generations, and then quantify the degree of  
83 reproductive isolation of introgressed flies with both parental species. Unfortunately,  
84 most sister *Drosophila* species are usually recognizable only on the basis of subtle  
85 differences in their genitalia whose dissection and measuring are quite difficult and  
86 laborious (Yassin 2021). A striking exception is the case of the species pair of *D.*  
87 *yakuba* and *D. santomea*, which, in addition to genital differences, also shows a  
88 contrasting pigmentation pattern (Lachaise et al. 2000). Both species lack the  
89 characteristic sexual dimorphism of pigmentation found in all other species of the  
90 *melanogaster* subgroup, where the last abdominal segments of the females are  
91 lighter than those of the males. Those segments are equally dark or equally light in  
92 both sexes of *D. yakuba* and *D. santomea*, respectively (Figure 1A-D). Both species  
93 can mate readily in the laboratory, producing fertile hybrid females but sterile males,  
94 and there is strong evidence from field studies and population genomics that  
95 hybridization takes place also in the wild on the island of Sao Tomé where *D.*  
96 *santomea* is endemic (Cariou et al. 2001; Llopart et al. 2005, 2014; Turissini and  
97 Matute 2017). Leveraging the crossability of the two species, short-term introgression  
98 experiments were used to identify the QTL underlying their morphological differences  
99 (Coyne et al. 2004; Carbone et al. 2005; Peluffo et al. 2015; Nagy et al. 2018; Liu et

100 al. 2019) and reproductive isolation (Moehring et al. 2006b,a; Cande et al. 2012).  
101 Introgressing dark pigmentation alleles of *D. yakuba* in the genome of the lightly  
102 pigmented *D. santomea* indicated that at least 5 loci were responsible for the striking  
103 pigmentation difference, namely the melanin-synthesis genes *yellow* (*y*), *tan* (*t*) and  
104 *ebony* (*e*) and the transcription factors *Abdominal-B* (*Abd-B*) and *POU-domain motif*  
105 *3* (*pdm3*) (Liu et al. 2019). Remarkably, long-term introgression experiments between  
106 *D. santomea* and *D. yakuba* showed, that in the absence of conscious selection on  
107 any of their morphological differences, reproductive isolation with the parental  
108 species may persist for 10 generations (Comeault and Matute 2018), but at  
109 generation 20, introgressed flies completely resemble their *D. yakuba* parent with no  
110 trace of isolation (Matute et al. 2020).

111 In 2015, our late colleague Jean R. David (1931-2021) started two long-term  
112 introgression experiments. In the first one, he deliberately introgressed light *D.*  
113 *santomea* alleles in the genome of dark *D. yakuba*, whereas in the second  
114 experiment he performed the opposite introgression, *i.e.* introgressing dark *D.*  
115 *yakuba* alleles in the genome of light *D. santomea*. In this paper, we report the  
116 progress of his 5-year experiments and the results of sequencing two lines from the  
117 first experiment. We show through behavioral assays that introgression of as low as  
118 0.5% of the genome has been sufficient to produce flies that were morphologically  
119 and behaviorally distinct from both parental species, even after 60 generations from  
120 the end of selection. We discuss the relevance of our work to the role of adaptive  
121 introgression in speciation.

122

123

## 124 **Materials and Methods**

### 125 *Generation of introgression lines*

126 Two experiments were conducted from reciprocal crosses between a strain of  
127 *D. yakuba*, which was collected by L. Tsacas from Kounden, Cameroon in 1966, and  
128 *D. santomea* from the type laboratory strain collected by D. Lachaise from Sao Tomé  
129 Island in 1998. Strains and experimental lines were reared at 21°C on a standard  
130 *Drosophila* medium kept in culture bottles at a density of ~1000 flies.

131 For the “light *yakuba*” experiment: virgin *D. yakuba* females were crossed to *D.*  
132 *santomea* males. Fertile F<sub>1</sub> females were mated to *D. yakuba* Kounden males, and  
133 the progeny called backcross to *yakuba* (*BCyak*). Backcross flies contained a small  
134 proportion (not determined) of fertile males. Those flies were used as a mass  
135 population to produce a self-reproducing strain. After a second generation of mass  
136 culture, phenotypes were observed on anaesthetized, 3-5 days old flies, and we  
137 assumed that most females had already copulated, many of them with fertile males.  
138 Selection was made on females only, who were far more variable than males. At  
139 each generation ~50 females with the lightest phenotype were transferred to lay eggs  
140 in new culture bottles. Precise phenotypic measurements were not done on regular  
141 basis and the progress of selection (if any) was not monitored. However, from our  
142 empirical observations, the selection was not efficient; each generation, the light  
143 females produced the same proportion of light and dark flies. This result persisted for  
144 more than a year (~ 15 generations). Then, some positive effects were observed:  
145 pigmentation of the females became lighter, and also some effects were found on the  
146 males, who also could be selected, leading to the establishment of an introgressed  
147 *D. yakuba* strain in 2016 (hereafter *BCyak*), quite lighter than the typical *D. yakuba*,  
148 especially for the females. However, after two years from the end of selection, female  
149 pigmentation slightly increased, attaining the levels of those found in F<sub>1</sub> hybrids. So a  
150 second round of selection on both males and females restarted in 2018, leading to  
151 two new derived introgression strains denoted *BCyak<sup>CC</sup>* and *BCyak<sup>seID</sup>* for flies  
152 selected for their light and dark abdomen, respectively.

153 For the “dark *santomea*” experiment: virgin *D. santomea* females were  
154 crossed to *D. yakuba* males. The fertile F<sub>1</sub> females were backcrossed to *D. yakuba*  
155 males, and the progeny was reared as a mass culture. Selection started by keeping  
156 females with a slightly dark abdomen, but the progress was very slow and took more  
157 than a year. Interestingly, the pigmentation of the males increased more rapidly than

158 that of the females, and after about half a year males were also included in selection.  
159 In 2016, an introgressed *D. santomea* strain, darker than the typical *D. santomea*,  
160 especially for males, was established and denoted *BCsan*.

161 Throughout the introgression experiments, no samples were archived frozen  
162 or in alcohol for genome sequencing and subsequent behavioral assays. Following  
163 the perturbations related to the COVID-19 pandemic lockdowns in early 2020, and  
164 the deterioration of Jean David's health later that year, only two strains, denoted  
165 *BCyak* and *BCsan* were present at the time of genome sequencing in December  
166 2020 and behavioral assays. Those two strains along with those of the parental  
167 species were used for genome sequencing and subsequent mapping of introgressed  
168 loci. Sequencing unraveled both strains to be predominated by the *D. yakuba*  
169 genome, sharing two introgressed *D. santomea* loci at genes known to affect  
170 pigmentation (see Results below). Because selection on dark *D. yakuba* alleles in a  
171 *D. santomea* background wouldn't have only fixed light *D. santomea* alleles, we  
172 therefore hypothesized that the two strains were derived from the same "light  
173 *yakuba*" experiment. This was reconfirmed by checking their male genitalia, which  
174 were both of the "*yakuba*" type, in contrast to previous microscopic preparations of  
175 *BCsan* strain up to April 2020. A contamination occurring after this date has likely  
176 replaced *BCsan* with one of the *BCyak* lines. Because the two strains, *BCyak* and  
177 *BCsan*, had two and three fixed *D. santomea* loci (see Results below), the two strains  
178 were then denoted *BCyak-2* and *BCyak-3*, respectively.

179

### 180 *Pigmentation scoring and genitalia dissection*

181 Abdominal pigmentation was scored on parental species, reciprocal F<sub>1</sub> hybrids  
182 and the introgression lines following the scoring scheme of David et al. 1990), *i.e.* the  
183 width of black area at the posterior part of each tergite was visually scored by  
184 establishing 11 phenotypic classes from 0 (no black pigment) up to 10 (tergite  
185 completely black). Abdominal tergites 2 to 7 as well as tergite 8 (the epigynium) were  
186 considered for females and tergites 2 to 6 as well as tergite 9 (the epandrium) were  
187 considered for males. For the introgression lines, scoring was made in 2016 at the  
188 end of selection, and then once each two years (*i.e.* in 2018 and 2020). For each  
189 strain,  $\geq 4$  days old, 10 females and 10 males were used. Pigmentation scores are  
190 provided in Supplementary Table 1. All statistical analyses were conducted using R  
191 (R Core Team 2016).



192 We also aimed to quantify subtle differences in pigmentation intensity between  
193 the two strains that were sequenced in 2020, *i.e.* *BCyak-2* and *BCyak-3*. For this,  
194 flies were killed in 70% ethanol and wings and legs removed using a pair of forceps.  
195 Each fly was then individually placed on its left side in 2 mL 70% ethanol solution in  
196 an excavated glass block and photographed under a binocular Leica stereoscope  
197 provided with a digital camera connected to a computer. Flies were photographed  
198 and grey scale intensity was measured using ImageJ (Abramoff et al. 2004) after  
199 manually defining the contour of each abdominal tergite.

200 The two parental species differ in their male genital traits, with the most easily  
201 traceable character being the loss of a pair of hypandrial (sternite 9) bristles in *D.*  
202 *santomea* (Nagy et al. 2018). At the end of selection in 2016, we dissected the male  
203 genitalia of the introgression strains and found that the presence or absence of the  
204 hypandrial bristles followed the direction of the backcross, *i.e.* present in *BCyak* and  
205 absent in *BCsan*. Male genitalia were then routinely dissected on a regular basis to  
206 guarantee the distinction between the lines of the two experiments.

207

#### 208 *Genome sequencing and analysis of two introgressed BCyak strains*

209 For the two strains *BCyak-2* and *BCyak-3*, genomic DNA was extracted from  
210 30 flies using standard DNA extraction kit protocol Nucleobond AXG20 (Macherey  
211 Nagel 740544) with NucleoBond Buffer Set IV (Macherey Nagel 740604). DNA was  
212 then sequenced on Illumina Novaseq6000 platform (Novogene UK company limited).  
213 In order to update the current reference genome of *D. yakuba* v1.05 retrieved from  
214 Flybase (<https://flybase.org/>, Thurmond et al. 2019), we compared this version to a  
215 genome of the same *D. yakuba* strain that was sequenced and assembled using  
216 hybrid short-read (Illumina) and long-read (Oxford Nanopore) method  
217 (<http://flyseq.org>; Kim et al. 2021). We used assembly-to-assembly command in  
218 Minimap2 (Li 2018) to generate a PAF file, based on which we attributed each new  $\geq$   
219 100 kb-long contig to the corresponding 1.05 chromosomal arm according to the  
220 longest homology tract. We also mapped each coding DNA sequence (CDS) to the  
221 new contigs using Blast (Altschul et al. 1997) in order to localize previously  
222 unmapped 1.05 contigs and genes. For each chromosome, assembled scaffolds  
223 were then ordered according to the cytological map of *D. yakuba* in (Lemeunier and  
224 Ashburner 1976). This resulted into a newly assembled reference genome of *D.*  
225 *yakuba* (cf. Supplementary Table 2) that we used for mapping introgressed loci.



226 Minimap2-generated SAM files were converted to BAM format using samtools  
227 1.9 software (Li et al. 2009). The BAM files were then cleaned and sorted using  
228 Picard v.2.0.1 (<http://broadinstitute.github.io/picard/>). We generated synchronized  
229 files for the 20 *D. y. yakuba* lines using Popoolation 2. We then used a customized  
230 Perl script to extrapolate allele frequencies to 2 diploid counts for each strain, after  
231 excluding sites with less than 10 reads and alleles with frequencies less than 25% for  
232 the total counts using a customized Perl script (cf. [Ferreira et al. 2021](#)). We also  
233 excluded tri-allelic sites for each line. We then parsed the parental strains for  
234 divergent sites, *i.e.* sites with distinct alleles fixed in each strain, and estimated the  
235 ancestry proportion at each site in the two introgressed strains in 50 kb-long  
236 windows.

237

### 238 *Mating behavioral assays*

239 We estimated precopulatory reproductive isolation between the two parental  
240 and the two introgressed strains, *Bcyak-2* and *BCyak-3*, using both no choice and  
241 two-choice analyses for both sexes. For no choice analyses, 3-4 days old virgin  
242 males and females of all strains were introduced in pairs in individual food vials at  
243 around 9:00 AM, and observed for two hours. Mating pairs were counted  
244 for each mating pair. For each possible combination of pairs, 20 vials were tested.  
245 The proportion of successful matings in intraspecific pairs of *D. yakuba* was  
246 considered as the expected proportion, and a chi-squared test comparing the  
247 observed proportions of successful mating involving an introgressed and a parental  
248 fly for each inter-strain combination.

249 Two-choice analyses were conducted for both males and females. For a given  
250 sex, a virgin fly was introduced into an individual vial along with two virgin flies from  
251 the opposite sex, with one being from the same strain as the tested fly and one from  
252 another strain. Copulations were observed also for two hours, and once copulation  
253 started flies were anesthetized under slight CO<sub>2</sub>, and the identity of the mating and  
254 the un-mating flies identified. In some instances, e.g., those involving a *D. santomea*  
255 male, no marking was needed. For most other cases, flies were individually left to  
256 feed in vials with artificial food blue or red colorants (Sainte Lucie co., France) 24  
257 hours before the start of the experiment as in [Comeault and Matute \(2018\)](#). A chi-  
258 squared test was then conducted for each strains combination to test the deviation  
259 from parity between homo- and hetero-gamic successful matings.

## 260 Results

### 261 *Experimental hybridization led to sexually dimorphic, phenotypically distinct* 262 *introgression lines*

263 The trajectories of pigmentation evolution during the two 5-year introgression  
264 experiments are given in Figure 1E-H in terms of the PCA of pigmentation scores.  
265 The first principal component (PC1) explained 75% of the variance. It mostly  
266 correlated with the pre-penultimate and penultimate segments (*i.e.* segments 6 and 7  
267 in females and 5 and 6 in males) at 0.56 and 0.78, respectively. The second principal  
268 component (PC2) explained 13% of the variance, and it mostly correlated with the  
269 ultimate segment of the body (*i.e.* the female epigynium and the male epandrium) at  
270 0.81. The trajectories differed according to the direction of selection and the sex.

271 At the end of selection in 2016, introgressed “light *yakuba*” females (Figure  
272 1E) were much lighter than the parental *D. yakuba* (*t*-test for the sum of segments 6  
273 and 7 = 56.65,  $P < 2.2 \times 10^{-16}$ ). They almost resembled *D. santomea* females,  
274 although they were still darker from the later species ( $t = 2.59$ ,  $P = 0.029$ ).  
275 Interestingly, all the segments were quite similar, and the last one, *i.e.* the epigynium  
276 or tergite 8, which is very dark in *D. yakuba* was the lightest in the introgressed  
277 females ( $t = 23.24$ ,  $P < 2.4 \times 10^{-9}$ ). The posterior segments of introgressed males  
278 (Figure 1F) were lighter than *D. yakuba* (*t*-test for the sum of segments 5 and 6 =  
279 9.25,  $P < 4.3 \times 10^{-6}$ ) but still much darker than *D. santomea* ( $t = 10.85$ ,  $P < 1.8 \times 10^{-6}$ ).  
280 However, the last segment, *i.e.* the epandrium or tergite 9, became almost  
281 completely light ( $t = 10.16$ ,  $P < 1.7 \times 10^{-6}$ ), as in *D. santomea* ( $t = 1.00$ ,  $P = 0.34$ ). For  
282 the “dark *D. santomea*” experiment, introgressed females (Figure 1G) at the end of  
283 selection in 2016 were darker than the parental *D. santomea* (*t*-test for the sum of  
284 segments 6 and 7 = 10.11,  $P < 3.3 \times 10^{-6}$ ), but not as dark as *D. yakuba* ( $t = 7.60$ ,  $P < 1.8 \times 10^{-5}$ ).  
285 The males (Figure 1H), on the other hand, had much darker posterior  
286 abdomen (*t*-test for the sum of segments 5 and 6 = 21.34,  $P < 5.1 \times 10^{-9}$ ), yet still  
287 lighter than *D. yakuba* ( $t = 10.96$ ,  $P < 4.1 \times 10^{-7}$ ). The last segments in both sexes  
288 were completely light as in *D. santomea*. Remarkably, introgressed females from  
289 both experiments significantly differed ( $t = 9.46$ ,  $P < 3.5 \times 10^{-6}$ ), but not introgressed  
290 males ( $t = 1.99$ ,  $P = 0.065$ ).

291 After two years from the end of selection in 2016, both experiments tended  
292 toward pigmentation values of the ancestral backcross parent, but at a much slower  
293 rate. This was most pronounced in females of the “light *yakuba*” experiment ( $t = 2.79$ ,

294  $P = 0.021$ ), but not in males ( $t = 1.02$ ,  $P = 0.321$ ), and in males of the “dark  
295 *santomea*” experiment ( $t = 3.42$ ,  $P < 0.004$ ), but not in females ( $t = 1.63$ ,  $P = 0.121$ ).  
296 For the second round of selection in the “light *yakuba*” experiment, starting in 2018,  
297 the two strains *BCyak<sup>CC</sup>* and *BCyak<sup>seID</sup>* very slightly differed only for male  
298 pigmentation of segments 5 and 6 in 2020 ( $t = 2.19$ ,  $P = 0.042$ ). This indicated that  
299 selection has attained its limits very rapidly in 2016, but morphological differences  
300 between introgressed flies and their parental species persisted for more than 60  
301 generations after selection.

302

303 *Two and three D. santomea loci were fixed in the two light D. yakuba strains*

304 As stated in the Materials and Methods, we sequenced in December 2020 the  
305 genome of the two remaining introgressed strains in the laboratory, which were  
306 named *BCyak* and *BCsan*. We then estimated the ancestry proportion of both  
307 parental species across the genome. This showed that both strains belonged to the  
308 “light *yakuba*” experiments, bearing only 5-6% alleles from *D. santomea*. The two  
309 strains showed almost the same profile of *D. santomea* introgression tracts, which  
310 were classified either as fixed or nearly fixed (*D. santomea* ancestry  $\geq 75\%$ ) and  
311 intermediate (*D. santomea* ancestry  $\geq 40\%$ ) (Table 1; Figure 2). The two strains were  
312 called *BCyak-2* and *BCyak-3* in reference to the number of fixed or nearly fixed  
313 introgression loci.

314 For *BCyak-2* (Figure 2A), the two fixed loci were both X-linked, each centering  
315 on one major melanin-synthesis gene, namely *y* and *t*. A third peak with intermediate  
316 frequencies was also present on chromosomal arm 2L and it centered on the *pdm3*  
317 transcription factor gene. All of those genes, *y*, *t* and *pdm3*, were found in the  
318 opposite experiment by Liu et al. (2019) who introgressed dark *D. yakuba* alleles into  
319 *D. santomea*.

320 The *BCyak-3* strain had exactly the same introgression profile as *BCyak-2*, *i.e.*  
321 fixed *y* and *t* loci and intermediate *pdm3* locus (Figure 2B). However, it had also two  
322 differences. First, a locus on chromosomal arm 3L had a high proportion of *santomea*  
323 alleles and nearly reached fixation. A second locus on chromosomal arm 3R also had  
324 high, yet intermediate proportions. None of those two loci harbors any of the  
325 previously identified genes known to affect pigmentation differences between *D.*  
326 *santomea* and *D. yakuba* (Liu et al. 2019). However, the 3L locus centered on a  
327 transcription factor, *Grunge (Gug)*, which controls the expression of *t* and *e* in *D.*

328 *melanogaster* (Rogers et al. 2014), and it is therefore a candidate pigmentation  
329 locus. There are no candidate pigmentation genes in the 3R locus with intermediate  
330 frequency in *BCyak-3*.

331 The two strains were likely derived from the *BCyak<sup>CC</sup>* and *BCyak<sup>seID</sup>* strains,  
332 which corresponded to the second round of selection in the “light *yakuba*”  
333 experiment, and which by 2020 slightly differed in male pigmentation (see above).  
334 However, the two sequenced strains, *BCyak-2* and *BCyak-3*, did not show significant  
335 difference in pigmentation, even when more numerical analyses were used to  
336 quantify melanization (Figure 3). Nonetheless, both strains showed significant  
337 differences with the two parental species for females’ segment 7 and males’ segment  
338 5, and from a single parent for females’ segment 6 and males’ segment 6,  
339 resembling *D. santomea* for the former and *D. yakuba* for the later.

340

#### 341 *Assortative mating between introgressed strains and parental species*

342 In no-choice experiments, homogamic mating occurred with almost the same  
343 frequency between pairs belonging to the same strain/species (70-85%) (Table 2).  
344 The two introgressed *yakuba* lines, *BCyak-2* and *BCyak-3*, readily mated with each  
345 other. However, a significant low mating success was observed in the cross between  
346 *D. yakuba* females and *BCyak-3* males. Interspecific crosses between *D. santomea*  
347 and *D. yakuba*, as well as between *D. santomea* females and males from both  
348 introgressed lines were significantly low. Remarkably, more successful heterogamic  
349 matings were observed in cases involving *D. santomea* males and females from the  
350 introgressed *yakuba* lines who have lighter abdomen compared to *D. yakuba*.

351 For choice experiments, all crosses involving *D. yakuba* and the introgressed  
352 lines on the one hand and *D. santomea* on the other hand were significantly  
353 homogamic, regardless to the tested sex (Table 3). However, sex-dependent  
354 assortative mating was found for all crosses between *D. yakuba* and introgressed  
355 strains. In all those crosses, females always showed a higher preference for  
356 homogamic males, whereas no significant departure from parity was observed for  
357 males.

358

359

## 360 Discussion

361 We reported here the results of five-years experiments to reciprocally  
362 introgress genes causing morphological difference between a pair of sister species  
363 with a major difference in body pigmentation, and a strong, yet incomplete  
364 reproductive isolation. We showed that such introgression was possible and that the  
365 limits of selection was attained within only a single year (~15 generations), with the  
366 new phenotypes of the introgressed flies remaining distinct from the parental species.  
367 Remarkably and contrary to previous studies with no conscious selection on a  
368 morphological trait (David et al. 1976; Amlou et al. 1997; Matute et al. 2020),  
369 assortative mating persisted in the introgressed flies even after four years from the  
370 end of selection (~60 generations).

371 The success of selective introgression might strongly depend on the nature of  
372 the phenotype. Pigmentation can easily be scored and measured and its variation  
373 often has a simple, oligogenic architecture (Massey and Wittkopp 2016). By contrast,  
374 when [Amlou et al. \(1997\)](#) tried to introgress resistance to a fruit toxin from *D.*  
375 *sechellia* into *D. simulans*, their attempt has failed, likely due to the difficulty of  
376 measuring toxicity and to the polygenic nature of survival as a phenotype. Indeed,  
377 many known cases of cross-species adaptive introgression involve color variation,  
378 e.g., coat in wolves ([Anderson et al. 2009](#)), skin and hair colors in humans  
379 ([Dannemann and Kelso 2017](#)), wing patterns in mimetic butterflies ([Edelman et al.](#)  
380 [2019](#)), winter-coats in hares ([Giska et al. 2019](#)), plumage in pigeons ([Vickrey et al.](#)  
381 [2018](#)) and wagtails ([Semenov et al. 2021](#)), and beaks in Darwin's finches ([Enbody et](#)  
382 [al. 2021](#)).

383 Introgressed flies differed from their parents in both the degree of pigmentation  
384 but also in resuscitating ancestral sexual dimorphism that was independently lost in  
385 the parental species. In most species of the *melanogaster* species subgroup,  
386 including the closely-related *D. teissieiri*, males have darker abdomen ([Yassin et al.](#)  
387 [2021](#)). The loss of sexual dimorphism in *D. santomea* and *D. yakuba* has likely  
388 involved different sex-specific regulatory changes affecting similar sets of melanin-  
389 synthesis genes. We were not able to sequence our introgressed “dark *santomea*”  
390 flies which were lost by mid-2020, but fortunately [Liu et al. \(2019\)](#) have conducted  
391 similar experiment and identified at least five genes whose *D. yakuba* alleles darken  
392 *D. santomea* male pigmentation. Our introgressed loci in the “light *yakuba*” flies  
393 overlapped with three out of these genes, namely the X-linked melanin-synthesis

394 genes *y* and *t* and the autosomal transcription factor *pdm3*. By contrast, we did not  
395 detect signal of introgression on either the melanin-synthesis gene *e* or the homeotic  
396 transcription factor *Abd-B*, which were identified in “dark *santomea*” (Liu et al. 2019).  
397 This was in agreement with Liu et al.’s (2019) observations. *Abd-B*, which has lower  
398 expression in *D. santomea*, does not affect *D. santomea* pigmentation genes due to  
399 *cis*-regulatory mutations of its melanin-synthesis genes. Similarly, whereas *D.*  
400 *santomea e* has a higher expression associated with the insertion of a helitron in its  
401 regulatory sequence, the presence of the same *D. santomea* haplotype in *D. yakuba*  
402 does not affect its pigmentation (Liu et al. 2019).

403 The most intriguing result was the autosomal locus that was fixed or nearly  
404 fixed in only one of the two introgressed *BCyak* strains, and which was not identified  
405 by Liu et al. (2019) in their “dark *santomea*” flies. This locus contained the  
406 transcription factor *Gug*, which may have the opposite effect of *pdm3* on  
407 pigmentation intensity and sexual dimorphism. RNA interference (RNAi) silencing of  
408 this gene in the abdomen of *D. melanogaster* reduces pigmentation, with the  
409 reduction being more pronounced in males, whereas RNAi of *pdm3* increases  
410 pigmentation, with the increase being more pronounced in females (Rogers et al.  
411 2014). Whereas *pdm3* is a suppressor of *y* in *D. santomea* (Liu et al. 2019), *Gug* is  
412 an enhancer of *t* and a suppressor of *e* in *D. melanogaster* (Rogers et al. 2014).  
413 Therefore, it is possible that the gain of female-specific pigmentation in *D. yakuba*  
414 was partly due to a down-regulation of *pdm3* whereas the loss of male-specific  
415 pigmentation in *D. santomea* was partly due to an up-regulation of *Gug*. The lack of  
416 significant difference in pigmentation between *BCyak-2* and *BCyak-3* argues against  
417 any role of the 3L locus, including *Gug*, on pigmentation. However, we note that  
418 pigmentation analysis of those two strains has been made in December 2021 after at  
419 least 18 months from the end of the second round of selection in the “light *yakuba*”  
420 experiment. Laboratory experiments and population analyses in *Drosophila* have  
421 suggested that balancing selection may act on pigmentation genes, hence restoring  
422 their alleles to intermediate frequencies when selection ends (L’Héritier and Teissier  
423 1937; Kalmus 1945; Rendel 1951). For example, pigmentation polymorphism in *D.*  
424 *kikkawai*, which is controlled by the *pdm3* locus (Yassin et al. 2016b), is maintained  
425 by heterozygous advantage in experimental populations (Freire-Maia 1964).  
426 Similarly, ancient balancing selection on *t* was demonstrated in *D. erecta* (Yassin et  
427 al. 2016a). Further isolation from *pdm3* and *t* of the introgressed locus on 3L and



428 subsequent molecular dissection are therefore needed to understand its potential  
429 role in pigmentation evolution.

430         Color-based assortative mating could lead to the loss of sexual dimorphism  
431 and ultimately pre-copulatory reproductive isolation. Our results showed that fixation  
432 of as low as 0.8 Mb (~0.5% of the genome) during selection on pigmentation loci has  
433 altered mating propensities between pure and introgressed flies. The demonstration  
434 of color-based (dis)assortative mating in *Drosophila* has long been problematic (Kopp  
435 et al. 2000; Llopart et al. 2002). Our behavioral assays support the presence of color-  
436 based assortative mating between *D. yakuba* and *D. santomea*, but in a way that was  
437 asymmetric between the sexes and dependent on the degree of divergence. On the  
438 one hand, light male *D. santomea* had almost 5-fold success in mating with  
439 introgressed light *D. yakuba* females than with dark pure *D. yakuba* in no choice  
440 experiments. On the other hand, light females from both introgressed *BCyak-2* and  
441 *BCyak-3* showed preference for their own light males over pure dark *D. yakuba*  
442 males. This suggests that the two X-linked *y* and *t* loci that were fixed in both strains  
443 probably play a role in color-based assortative mating. However, female-limited  
444 assortative mating also existed between the introgressed strains *BCyak-2* and  
445 *BCyak-3*, in spite of their great coloration resemblance. The fixed autosomal locus in  
446 *BCyak-3* may therefore also contain elements affecting behavior. In addition to its  
447 possible effect on pigmentation, the transcription factor *Gug* also interacts with  
448 another transcription factor, *hairy* (*h*), which is also located in the same fixed locus, in  
449 affecting the size of male genital organs that are used to grasp the females during  
450 mating, namely the surstyli (claspers) (Hagen et al. 2021). The effect of pigmentation  
451 genes on mating behavior can be attained either directly through pleiotropy or  
452 indirectly genetic linkage to other mating phenotypes (Wellenreuther et al. 2014).  
453 Pleiotropy should drive more pervasive associations between pigmentation and  
454 mating behavior than linkage. A possible source of genetic linkage could have been  
455 the physical proximity in the low recombining subtelomeric region of the X  
456 chromosome between *y* and the enhancer of *scute* (*sc*) which led to the loss of the  
457 hypandrial bristles and gain of extranumerary sex comb teeth in *D. santomea* males  
458 (Nagy et al. 2018). Both characters may be involved in copulation and consequently  
459 contribute to mating success or choice. However, we found that this strong linkage  
460 was broken during the first year of the selection experiment, dissociating both traits.



461 In conclusion, our result demonstrate that selective introgression on a  
462 morphological phenotype could rapidly lead to the evolution of pervasive behavioral  
463 isolation. They hence complement previous *Drosophila* experimental speciation  
464 studies, which showed that adaptation from standing variation to contrasting  
465 environments could lead the evolution of reproductive isolation (Fry 2009).  
466 Pigmentation also responds to diverse natural selection pressures (Bastide et al.  
467 2014) including those that discriminate the ecological niches of *D. santomea* and *D.*  
468 *yakuba* such as temperature, desiccation and UV intensity (Matute et al. 2009;  
469 Matute and Harris 2013; Comeault and Matute 2021). Further experimental  
470 manipulations, e.g., testing competition between pure and introgressed flies in  
471 different environments, coupled with the investigation of post-copulatory isolation  
472 barriers, will definitively shed more light on genome dynamics of homoploid  
473 speciation in animals, hence bridging experimental studies with empirical field  
474 observations in a primary model.

475

#### 476 **Conflicts of interest**

477 We declare no conflicts of interest.

478

#### 479 **Acknowledgments**

480 This work was partly funded by the French Agence Nationale de la Recherche (ANR)  
481 grant number ANR-18-CE02-0008 to A.Y.

482

#### 483 **References**

484 Abbott, R., D. Albach, S. Ansell, J. W. Arntzen, S. J. E. Baird, N. Bierne, J.  
485 Boughman, A. Brelsford, C. A. Buerkle, R. Buggs, R. K. Butlin, U. Dieckmann, F.  
486 Eroukhanoff, A. Grill, S. H. Cahan, J. S. Hermansen, G. Hewitt, A. G. Hudson, C.  
487 Jiggins, J. Jones, B. Keller, T. Marczewski, J. Mallet, P. Martinez-Rodriguez, M.  
488 Möst, S. Mullen, R. Nichols, A. W. Nolte, C. Parisod, K. Pfennig, A. M. Rice, M. G.  
489 Ritchie, B. Seifert, C. M. Smadja, R. Stelkens, J. M. Szymura, R. Väinölä, J. B. W.  
490 Wolf, and D. Zinner. 2013. Hybridization and speciation. *Journal of Evolutionary*  
491 *Biology* 26:229–246.  
492 Abramoff, M. D., P. J. Magalhães, and S. J. Ram. 2004. Image processing with  
493 ImageJ. *Biophotonics international* 11:36–42.

- 494 Altschul, S. F., T. L. Madden, A. A. Schäffer, J. Zhang, Z. Zhang, W. Miller, and D. J.  
495 Lipman. 1997. Gapped BLAST and PSI-BLAST: a new generation of protein  
496 database search programs. *Nucl Acids Res* 25:3389–3402.
- 497 Amlou, M., E. Pla, B. Moreteau, and J. R. David. 1997. Genetic analysis by  
498 interspecific crosses of the tolerance of *Drosophila*  
499 *sechellia* to major aliphatic acids of its host plant. *Genet Sel Evol*  
500 29:511.
- 501 Anderson, T. M., B. M. vonHoldt, S. I. Candille, M. Musiani, C. Greco, D. R. Stahler,  
502 D. W. Smith, B. Padhukasahasram, E. Randi, J. A. Leonard, C. D. Bustamante, E. A.  
503 Ostrander, H. Tang, R. K. Wayne, and G. S. Barsh. 2009. Molecular and  
504 Evolutionary History of Melanism in North American Gray Wolves. *Science*  
505 323:1339–1343. American Association for the Advancement of Science.
- 506 Bastide, H., A. Yassin, E. J. Johannning, and J. E. Pool. 2014. Pigmentation in  
507 *Drosophila melanogaster* reaches its maximum in Ethiopia and correlates most  
508 strongly with ultra-violet radiation in sub-Saharan Africa. *BMC evolutionary biology*  
509 14:179.
- 510 Cande, J., P. Andolfatto, B. Prud'homme, D. L. Stern, and N. Gompel. 2012.  
511 Evolution of Multiple Additive Loci Caused Divergence between *Drosophila yakuba*  
512 and *D. santomea* in Wing Rowing during Male Courtship. *PLOS ONE* 7:e43888.  
513 Public Library of Science.
- 514 Carbone, M. A., A. Llopart, M. deAngelis, J. A. Coyne, and T. F. C. Mackay. 2005.  
515 Quantitative Trait Loci Affecting the Difference in Pigmentation Between *Drosophila*  
516 *yakuba* and *D. santomea*. *Genetics* 171:211–225.
- 517 Cariou, M.-L., J.-F. Silvain, V. Daubin, J.-L. D. Lage, and D. Lachaise. 2001.  
518 Divergence between *Drosophila santomea* and allopatric or sympatric populations of  
519 *D. yakuba* using paralogous amylase genes and migration scenarios along the  
520 Cameroon volcanic line. *Molecular Ecology* 10:649–660.
- 521 Castillo, D. M., and D. A. Barbash. 2017. Moving Speciation Genetics Forward:  
522 Modern Techniques Build on Foundational Studies in *Drosophila*. *Genetics* 207:825–  
523 842.
- 524 Comeault, A. A., and D. R. Matute. 2018. Genetic divergence and the number of  
525 hybridizing species affect the path to homoploid hybrid speciation. *PNAS* 115:9761–  
526 9766. National Academy of Sciences.
- 527 Comeault, A. A., and D. R. Matute. 2021. Temperature-Dependent Competitive

- 528 Outcomes between the Fruit Flies *Drosophila santomea* and *Drosophila yakuba*. The  
529 American Naturalist 197:312–323. The University of Chicago Press.
- 530 Coyne, J. A., S. Elwyn, S. Y. Kim, and A. Llopart. 2004. Genetic studies of two sister  
531 species in the *Drosophila melanogaster* subgroup, *D. yakuba* and *D. santomea*.  
532 Genetics Research 84:11–26. Cambridge University Press.
- 533 Coyne, J. A., and H. A. Orr. 2004. Speciation. Sinauer.
- 534 Dannemann, M., and J. Kelso. 2017. The Contribution of Neanderthals to Phenotypic  
535 Variation in Modern Humans. The American Journal of Human Genetics 101:578–  
536 589.
- 537 David, J., C. Bocquet, F. Lemeunier, and L. Tsacas. 1976. Persistence of male  
538 sterility in strains issued from hybrids between two sibling species: *Drosophila*  
539 *simulans* and *D. mauritiana*. J Genet 62:93.
- 540 David, J. R., P. Capy, and J.-P. Gauthier. 1990. Abdominal pigmentation and growth  
541 temperature in *Drosophila melanogaster*: Similarities and differences in the norms of  
542 reaction of successive segments. Journal of Evolutionary Biology 3:429–445.
- 543 Ding, Y., A. Berrocal, T. Morita, K. D. Longden, and D. L. Stern. 2016. Natural  
544 courtship song variation caused by an intronic retroelement in an ion channel gene.  
545 Nature 536:329–332.
- 546 Edelman, N. B., P. B. Frandsen, M. Miyagi, B. Clavijo, J. Davey, R. B. Dikow, G.  
547 García-Accinelli, S. M. Van Belleghem, N. Patterson, D. E. Neafsey, R. Challis, S.  
548 Kumar, G. R. P. Moreira, C. Salazar, M. Chouteau, B. A. Counterman, R. Papa, M.  
549 Blaxter, R. D. Reed, K. K. Dasmahapatra, M. Kronforst, M. Joron, C. D. Jiggins, W.  
550 O. McMillan, F. Di Palma, A. J. Blumberg, J. Wakeley, D. Jaffe, and J. Mallet. 2019.  
551 Genomic architecture and introgression shape a butterfly radiation. Science  
552 366:594–599. American Association for the Advancement of Science.
- 553 Enbody, E. D., C. G. Sprehn, A. Abzhanov, H. Bi, M. P. Dobreva, O. G. Osborne, C.-  
554 J. Rubin, P. R. Grant, B. R. Grant, and L. Andersson. 2021. A multispecies BCO2  
555 beak color polymorphism in the Darwin’s finch radiation. Current Biology 31:5597-  
556 5604.e7.
- 557 Ferreira, E. A., S. Lambert, T. Verrier, F. Marion-Poll, and A. Yassin. 2021. Soft  
558 Selective Sweep on Chemosensory Genes Correlates with Ancestral Preference for  
559 Toxic Noni in a Specialist *Drosophila* Population. Genes 12:32. Multidisciplinary  
560 Digital Publishing Institute.
- 561 Freire-Maia, N. 1964. Segregational Load in *Drosophila Kikkawai*. II. Experimental

- 562 Populations. *Genetics* 50:221–229.
- 563 Fry, J. D. 2009. 20. LABORATORY EXPERIMENTS ON SPECIATION. Pp. 631–656  
564 *in* 20. LABORATORY EXPERIMENTS ON SPECIATION. University of California  
565 Press.
- 566 Giska, I., L. Farelo, J. Pimenta, F. A. Seixas, M. S. Ferreira, J. P. Marques, I.  
567 Miranda, J. Letty, H. Jenny, K. Hackländer, E. Magnussen, and J. Melo-Ferreira.  
568 2019. Introgression drives repeated evolution of winter coat color polymorphism in  
569 hares. *PNAS* 116:24150–24156. National Academy of Sciences.
- 570 Hagen, J. F. D., C. C. Mendes, S. R. Booth, J. Figueras Jimenez, K. M. Tanaka, F. A.  
571 Franke, L. Baudouin-Gonzalez, A. M. Ridgway, S. Arif, M. D. S. Nunes, and A. P.  
572 McGregor. 2021. Unraveling the Genetic Basis for the Rapid Diversification of Male  
573 Genitalia between *Drosophila* Species. *Molecular Biology and Evolution* 38:437–448.
- 574 Hedrick, P. W. 2013. Adaptive introgression in animals: examples and comparison to  
575 new mutation and standing variation as sources of adaptive variation. *Molecular*  
576 *Ecology* 22:4606–4618.
- 577 Kalmus, H. 1945. Adaptive and selective responses of a population of *Drosophila*  
578 *melanogaster* containing *and<sup>e+</sup>* to differences in temperature, humidity and to  
579 selection for developmental speed. *Journ. of Genetic* 47:58–63.
- 580 Kim, B. Y., J. R. Wang, D. E. Miller, O. Barmina, E. Delaney, A. Thompson, A. A.  
581 Comeault, D. Peede, E. R. D’Agostino, J. Pelaez, J. M. Aguilar, D. Haji, T.  
582 Matsunaga, E. E. Armstrong, M. Zych, Y. Ogawa, M. Stamenković-Radak, M. Jelić,  
583 M. S. Veselinović, M. Tanasković, P. Erić, J.-J. Gao, T. K. Katoh, M. J. Toda, H.  
584 Watabe, M. Watada, J. S. Davis, L. C. Moyle, G. Manoli, E. Bertolini, V. Košťál, R. S.  
585 Hawley, A. Takahashi, C. D. Jones, D. K. Price, N. Whiteman, A. Kopp, D. R. Matute,  
586 and D. A. Petrov. 2021. Highly contiguous assemblies of 101 drosophilid genomes.  
587 *eLife* 10:e66405. eLife Sciences Publications, Ltd.
- 588 Kopp, A., I. Duncan, and S. B. Carroll. 2000. Genetic control and evolution of  
589 sexually dimorphic characters in *Drosophila*. *Nature* 408:553–559.
- 590 Kulmuni, J., R. K. Butlin, K. Lucek, V. Savolainen, and A. M. Westram. 2020.  
591 Towards the completion of speciation: the evolution of reproductive isolation beyond  
592 the first barriers. *Philosophical Transactions of the Royal Society B: Biological*  
593 *Sciences* 375:20190528. Royal Society.
- 594 Lachaise, D., M. Harry, M. Solignac, F. Lemeunier, V. Bénassi, and M.-L. Cariou.  
595 2000. Evolutionary novelties in islands: *Drosophila santomea*, a new *melanogaster*

- 596 sister species from São Tomé. *Proceedings of the Royal Society of London B:*  
597 *Biological Sciences* 267:1487–1495.
- 598 Lamichhaney, S., J. Berglund, M. S. Almén, K. Maqbool, M. Grabherr, A. Martinez-  
599 Barrio, M. Promerová, C.-J. Rubin, C. Wang, N. Zamani, B. R. Grant, P. R. Grant, M.  
600 T. Webster, and L. Andersson. 2015. Evolution of Darwin’s finches and their beaks  
601 revealed by genome sequencing. *Nature* 518:371–375.
- 602 Leducq, J.-B., L. Nielly-Thibault, G. Charron, C. Eberlein, J.-P. Verta, P. Samani, K.  
603 Sylvester, C. T. Hittinger, G. Bell, and C. R. Landry. 2016. Speciation driven by  
604 hybridization and chromosomal plasticity in a wild yeast. *Nat Microbiol* 1:1–10.
- 605 Lemeunier, F., and M. Ashburner. 1976. Relationships within the melanogaster  
606 species subgroup of the genus *Drosophila* (Sophophora) - II. Phylogenetic  
607 relationships between six species based upon polytene chromosome banding  
608 sequences. *Proceedings of the Royal Society of London. Series B. Biological*  
609 *Sciences* 193:275–294. Royal Society.
- 610 L’Héritier, P., and G. Teissier. 1937. Élimination des formes mutantes dans les  
611 populations de drosophile. Cas des drosophiles ebony. *Comptes rendus des*  
612 *séances de la société de biologie* 124:882–884.
- 613 Li, H. 2018. Minimap2: pairwise alignment for nucleotide sequences. *Bioinformatics*  
614 34:3094–3100.
- 615 Li, H., B. Handsaker, A. Wysoker, T. Fennell, J. Ruan, N. Homer, G. Marth, G.  
616 Abecasis, and R. Durbin. 2009. The Sequence Alignment/Map format and SAMtools.  
617 *Bioinformatics* 25:2078–2079.
- 618 Liu, Y., M. Ramos-Womack, C. Han, P. Reilly, K. L. Brackett, W. Rogers, T. M.  
619 Williams, P. Andolfatto, D. L. Stern, and M. Rebeiz. 2019. Changes throughout a  
620 Genetic Network Mask the Contribution of Hox Gene Evolution. *Current Biology*  
621 29:2157-2166.e6.
- 622 Llopart, A., S. Elwyn, and J. A. Coyne. 2002. Pigmentation and mate choice in  
623 *Drosophila*. *Nature* 419:360–360.
- 624 Llopart, A., D. Herrig, E. Brud, and Z. Stecklein. 2014. Sequential adaptive  
625 introgression of the mitochondrial genome in *Drosophila yakuba* and *Drosophila*  
626 *santomea*. *Molecular Ecology* 23:1124–1136.
- 627 Llopart, A., D. Lachaise, and J. A. Coyne. 2005. An Anomalous Hybrid Zone in  
628 *Drosophila*. *Evolution* 59:2602–2607.
- 629 Lohse, K., M. Clarke, M. G. Ritchie, and W. J. Etges. 2015. Genome-wide tests for

- 630 introgression between cactophilic *Drosophila* implicate a role of inversions during  
631 speciation. *Evolution* 69:1178–1190.
- 632 Mai, D., M. J. Nalley, and D. Bachtrog. 2020. Patterns of Genomic Differentiation in  
633 the *Drosophila nasuta* Species Complex. *Molecular Biology and Evolution* 37:208–  
634 220.
- 635 Mallet, J. 2006. What does *Drosophila* genetics tell us about speciation? *Trends in*  
636 *Ecology & Evolution* 21:386–393.
- 637 Martin, C. H., and E. J. Richards. 2019. The paradox behind the pattern of rapid  
638 adaptive radiation: how can the speciation process sustain itself through an early  
639 burst? *Annual review of ecology, evolution, and systematics*.
- 640 Massey, J. H., J. Li, D. L. Stern, and P. J. Wittkopp. 2021. Distinct genetic  
641 architectures underlie divergent thorax, leg, and wing pigmentation between  
642 *Drosophila elegans* and *D. gunungcola*. *Heredity* 127:467–474.
- 643 Massey, J. H., and P. J. Wittkopp. 2016. Chapter Two - The Genetic Basis of  
644 Pigmentation Differences Within and Between *Drosophila* Species. Pp. 27–61 *in* V.  
645 Orgogozo, ed. *Current Topics in Developmental Biology*. Academic Press.
- 646 Matute, D. R., A. A. Comeault, E. Earley, A. Serrato-Capuchina, D. Peede, A.  
647 Monroy-Eklund, W. Huang, C. D. Jones, T. F. C. Mackay, and J. A. Coyne. 2020.  
648 Rapid and Predictable Evolution of Admixed Populations Between Two *Drosophila*  
649 Species Pairs. *Genetics* 214:211–230.
- 650 Matute, D. R., and A. Harris. 2013. The Influence of Abdominal Pigmentation on  
651 Desiccation and Ultraviolet Resistance in Two Species of *Drosophila*. *Evolution*  
652 67:2451–2460.
- 653 Matute, D. R., C. J. Novak, and J. A. Coyne. 2009. Temperature-Based Extrinsic  
654 Reproductive Isolation in Two Species of *Drosophila*. *Evolution* 63:595–612.
- 655 Moehring, A. J., A. Llopart, S. Elwyn, J. A. Coyne, and T. F. C. Mackay. 2006a. The  
656 Genetic Basis of Postzygotic Reproductive Isolation Between *Drosophila santomea*  
657 and *D. yakuba* Due to Hybrid Male Sterility. *Genetics* 173:225–233.
- 658 Moehring, A. J., A. Llopart, S. Elwyn, J. A. Coyne, and T. F. C. Mackay. 2006b. The  
659 Genetic Basis of Prezygotic Reproductive Isolation Between *Drosophila santomea*  
660 and *D. yakuba* Due to Mating Preference. *Genetics* 173:215–223.
- 661 Nagy, O., I. Nuez, R. Savisaar, A. E. Peluffo, A. Yassin, M. Lang, D. L. Stern, D.  
662 Matute, J. R. David, and V. Courtier-Orgogozo. 2018. Correlated Evolution of two  
663 Sensory Organs via a Single Cis-Regulatory Nucleotide Change. *Curr Biol* in press.



- 664 Payseur, B. A., and L. H. Rieseberg. 2016. A genomic perspective on hybridization  
665 and speciation. *Molecular Ecology* 25:2337–2360.
- 666 Pease, J. B., D. C. Haak, M. W. Hahn, and L. C. Moyle. 2016. Phylogenomics  
667 Reveals Three Sources of Adaptive Variation during a Rapid Radiation. *PLOS*  
668 *Biology* 14:e1002379. Public Library of Science.
- 669 Peluffo, A. E., I. Nuez, V. Debat, R. Savisaar, D. L. Stern, and V. Orgogozo. 2015. A  
670 Major Locus Controls a Genital Shape Difference Involved in Reproductive Isolation  
671 Between *Drosophila yakuba* and *Drosophila santomea*. *G3: Genes, Genomes,*  
672 *Genetics* g3.115.023481.
- 673 R Core Team. 2016. R: A language and environment for statistical computing. R  
674 Foundation for Statistical Computing, Vienna, Austria.
- 675 Racimo, F., S. Sankararaman, R. Nielsen, and E. Huerta-Sánchez. 2015. Evidence  
676 for archaic adaptive introgression in humans. *Nat Rev Genet* 16:359–371.
- 677 Rendel, J. M. 1951. Mating of Ebony Vestigial and Wild Type *Drosophila*  
678 *melanogaster* in Light and Dark. *Evolution* 5:226–230. [Society for the Study of  
679 Evolution, Wiley].
- 680 Richards, E. J., M. R. Servedio, and C. H. Martin. 2019. Searching for Sympatric  
681 Speciation in the Genomic Era. *BioEssays* 41:1900047.
- 682 Rogers, W. A., S. Grover, S. J. Stringer, J. Parks, M. Rebeiz, and T. M. Williams.  
683 2014. A survey of the trans-regulatory landscape for *Drosophila melanogaster*  
684 abdominal pigmentation. *Developmental Biology* 385:417–432.
- 685 Schridder, D. R., J. Ayroles, D. R. Matute, and A. D. Kern. 2018. Supervised machine  
686 learning reveals introgressed loci in the genomes of *Drosophila simulans* and *D.*  
687 *sechellia*. *PLOS Genetics* 14:e1007341. Public Library of Science.
- 688 Schumer, M., G. G. Rosenthal, and P. Andolfatto. 2014. How Common Is Homoploid  
689 Hybrid Speciation? *Evolution* 68:1553–1560.
- 690 Schumer, M., C. Xu, D. L. Powell, A. Durvasula, L. Skov, C. Holland, J. C. Blazier, S.  
691 Sankararaman, P. Andolfatto, G. G. Rosenthal, and M. Przeworski. 2018. Natural  
692 selection interacts with recombination to shape the evolution of hybrid genomes.  
693 *Science* 360:656–660. American Association for the Advancement of Science.
- 694 Semenov, G. A., E. Linck, E. D. Enbody, R. B. Harris, D. R. Khaydarov, P. Alström,  
695 L. Andersson, and S. A. Taylor. 2021. Asymmetric introgression reveals the genetic  
696 architecture of a plumage trait. *Nat Commun* 12:1019.
- 697 Servedio, M. R., G. S. V. Doorn, M. Kopp, A. M. Frame, and P. Nosil. 2011. Magic



698 traits in speciation: ‘magic’ but not rare? *Trends in Ecology & Evolution* 26:389–397.  
699 Shahandeh, M. P., and T. L. Turner. 2020. The complex genetic architecture of male  
700 mate choice evolution between *Drosophila* species. *Heredity* 124:737–750.  
701 Smadja, C. M., and R. K. Butlin. 2011. A framework for comparing processes of  
702 speciation in the presence of gene flow. *Molecular Ecology* 20:5123–5140.  
703 Suvorov, A., B. Y. Kim, J. Wang, E. E. Armstrong, D. Peede, E. R. R. D’Agostino, D.  
704 K. Price, P. Waddell, M. Lang, V. Courtier-Orgogozo, J. R. David, D. Petrov, D. R.  
705 Matute, D. R. Schrider, and A. A. Comeault. 2021. Widespread introgression across  
706 a phylogeny of 155 *Drosophila* genomes. *Current Biology* 0. Elsevier.  
707 Tanaka, K. M., C. Hopfen, M. R. Herbert, C. Schlötterer, D. L. Stern, J. P. Masly, A.  
708 P. McGregor, and M. D. S. Nunes. 2015. Genetic Architecture and Functional  
709 Characterization of Genes Underlying the Rapid Diversification of Male External  
710 Genitalia Between *Drosophila simulans* and *Drosophila mauritiana*. *Genetics*  
711 *genetics.114.174045*.  
712 The Marie Curie SPECIATION Network. 2012. What do we need to know about  
713 speciation? *Trends in Ecology & Evolution* 27:27–39. Elsevier.  
714 Thibert-Plante, X., and S. Gavrillets. 2013. Evolution of mate choice and the so-called  
715 magic traits in ecological speciation. *Ecology Letters* 16:1004–1013.  
716 Thurmond, J., J. L. Goodman, V. B. Strelets, H. Attrill, L. S. Gramates, S. J.  
717 Marygold, B. B. Matthews, G. Millburn, G. Antonazzo, V. Trovisco, T. C. Kaufman, B.  
718 R. Calvi, N. Perrimon, S. R. Gelbart, J. Agapite, K. Broll, L. Crosby, G. dos Santos,  
719 D. Emmert, L. S. Gramates, K. Falls, V. Jenkins, B. Matthews, C. Sutherland, C.  
720 Tabone, P. Zhou, M. Zytovicz, N. Brown, G. Antonazzo, H. Attrill, P. Garapati, A.  
721 Holmes, A. Larkin, S. Marygold, G. Millburn, C. Pilgrim, V. Trovisco, P. Urbano, T.  
722 Kaufman, B. Calvi, B. Czoch, J. Goodman, V. Strelets, J. Thurmond, R. Cripps, and  
723 P. Baker. 2019. FlyBase 2.0: the next generation. *Nucleic Acids Res* 47:D759–D765.  
724 Turissini, D. A., and D. R. Matute. 2017. Fine scale mapping of genomic  
725 introgressions within the *Drosophila yakuba* clade. *PLOS Genetics* 13:e1006971.  
726 Vickrey, A. I., R. Bruders, Z. Kronenberg, E. Mackey, R. J. Bohlender, E. T. Maclary,  
727 R. Maynez, E. J. Osborne, K. P. Johnson, C. D. Huff, M. Yandell, and M. D. Shapiro.  
728 2018. Introgression of regulatory alleles and a missense coding mutation drive  
729 plumage pattern diversity in the rock pigeon. *Elife* 7:e34803.  
730 Wellenreuther, M., E. I. Svensson, and B. Hansson. 2014. Sexual selection and  
731 genetic colour polymorphisms in animals. *Molecular Ecology* 23:5398–5414.

732 White, N. J., R. R. Snook, and I. Eyres. 2020. The Past and Future of Experimental  
733 Speciation. *Trends in Ecology & Evolution* 35:10–21.

734 Yassin, A. 2021. Systematics in the (Post)genomic Era: A Look at the *Drosophila*  
735 Model. Pp. 61–78 *in* *Systematics and the Exploration of Life*. John Wiley & Sons, Ltd.

736 Yassin, A., H. Bastide, H. Chung, M. Veuille, J. R. David, and J. E. Pool. 2016a.  
737 Ancient balancing selection at tan underlies female colour dimorphism in *Drosophila*  
738 *erecta*. *Nature Communications* 7:10400.

739 Yassin, A., E. K. Delaney, A. J. Reddiex, T. D. Seher, H. Bastide, N. C. Appleton, J.  
740 B. Lack, J. R. David, S. F. Chenoweth, J. E. Pool, and A. Kopp. 2016b. The *pdm3*  
741 Locus Is a Hotspot for Recurrent Evolution of Female-Limited Color Dimorphism in  
742 *Drosophila*. *Current Biology* 26:2412–2422.

743 Yassin, A., N. Gidaszewski, V. Debat, and J. R. David. 2021. Long-term evolution of  
744 quantitative traits in the *Drosophila melanogaster* species subgroup.

745

746

747

748

749 Table 1. Coordinates according to the *Drosophila yakuba* reference genome v.1.05 of  
750 *D. santomea* loci that were fixed (F) or segregate at intermediate frequencies (I) in  
751 introgressed light *D. yakuba* strains.

| Locus                    | Length  | <i>BCyak-2</i> | <i>BCyak-3</i> | No. of genes | Candidate(s) |
|--------------------------|---------|----------------|----------------|--------------|--------------|
| X:15,000-226,000         | 211 kb  | F              | F              | 22           | <i>y</i>     |
| X:17,395,000-17,967,000  | 572 kb  | F              | F              | 49           | <i>t</i>     |
| 2L:16,511,000-18,064,000 | 1553 kb | I              | I              | 253          | <i>pdm3</i>  |
| 3L:3,160,000-4,086,000   | 926 kb  | ---            | F              | 168          | <i>Gug</i>   |
| 3R:19,079,000-21,169,000 | 2090 kb | ---            | I              | 304          |              |

752

753

754

755

756 Table 2. No choice experiment within and between pure parental species, *D. yakuba*  
 757 and *D. santomea*, and two introgressed “light *yakuba*” strains. 20 copulating pairs  
 758 were tested per cross. For heterogamic crosses, significant deviation from the  
 759 homogamic *D. yakuba* cross cross, *i.e.* 17 successful crosses out of 20, was  
 760 estimated using chi-squared test: \* < 0.05, \*\* < 0.01 and \*\*\* < 0.001.

| Females \ Males | <i>yakuba</i> | <i>BCyak-2</i> | <i>BCyak-3</i> | <i>santomea</i> |
|-----------------|---------------|----------------|----------------|-----------------|
| <i>yakuba</i>   | 17            | 17             | 14             | 2 (***)         |
| <i>BCyak-2</i>  | 15            | 14             | 12             | 1 (***)         |
| <i>BCyak-3</i>  | 12 (**)       | 15             | 16             | 0 (***)         |
| <i>santomea</i> | 2 (***)       | 8 (***)        | 8 (***)        | 15              |

761

762

763 Table 3. Two-choice mating preference experiments. F.E.T. = significance level of  
 764 Fisher's exact test for homogamy in each possible combination: \* < 0.05, \*\* < 0.01  
 765 and \*\*\* < 0.001.

| Cross                             | Female choice |                |                 |        | Male choice |                |                 |        |
|-----------------------------------|---------------|----------------|-----------------|--------|-------------|----------------|-----------------|--------|
|                                   | N             | Strain1        | Strain2         | F.E.T. | N           | Strain1        | Strain2         | F.E.T. |
| <i>yakuba</i><br><i>BCyak-2</i>   |               | <i>yakuba</i>  | <i>BCyak-2</i>  |        |             | <i>yakuba</i>  | <i>BCyak-2</i>  |        |
|                                   | 30            | 12             | 6               |        | 30          | 17             | 9               |        |
|                                   | 40            | 7              | 16              | *      | 30          | 11             | 10              | n.s.   |
| <i>yakuba</i><br><i>BCyak-3</i>   |               | <i>yakuba</i>  | <i>BCyak-3</i>  |        |             | <i>yakuba</i>  | <i>BCyak-3</i>  |        |
|                                   | 40            | 22             | 7               |        | 30          | 9              | 7               |        |
|                                   | 35            | 11             | 15              | *      | 53          | 19             | 11              | n.s.   |
| <i>yakuba</i><br><i>santomea</i>  |               | <i>yakuba</i>  | <i>santomea</i> |        |             | <i>yakuba</i>  | <i>santomea</i> |        |
|                                   | 28            | 12             | 0               |        | 25          | 13             | 3               |        |
|                                   | 30            | 0              | 23              | ***    | 30          | 0              | 22              | ***    |
| <i>BCyak-2</i><br><i>BCyak-3</i>  |               | <i>BCyak-2</i> | <i>BCyak-3</i>  |        |             | <i>BCyak-2</i> | <i>BCyak-3</i>  |        |
|                                   | 30            | 12             | 4               |        | 50          | 17             | 11              |        |
|                                   | 30            | 5              | 12              | *      | 30          | 10             | 14              | n.s.   |
| <i>BCyak-2</i><br><i>santomea</i> |               | <i>BCyak-2</i> | <i>santomea</i> |        |             | <i>BCyak-2</i> | <i>santomea</i> |        |
|                                   | 20            | 13             | 0               |        | 30          | 12             | 7               |        |
|                                   | 20            | 2              | 16              | ***    | 37          | 2              | 21              | ***    |
| <i>BCyak-3</i><br><i>santomea</i> |               | <i>BCyak-3</i> | <i>santomea</i> |        |             | <i>BCyak-3</i> | <i>santomea</i> |        |
|                                   | 50            | 22             | 4               |        | 30          | 13             | 6               |        |
|                                   | 20            | 0              | 16              | ***    | 30          | 2              | 21              | ***    |

766

767

768

769 **Figures legends**

770

771 **Figure 1** – (A-D) Photomicrographs of females and males of the parental species,  
772 light *Drosophila santomea* (A,C) and dark *D. yakuba* (B,D). (E-H) Pigmentation  
773 introgression trajectories in the “light *yakuba*” (E,F) and the “dark *santomea*” (G,H)  
774 experiments. (E-H) Principal Component Analysis (PCA) of pigmentation scores on  
775 six successive abdominal segments per individual was conducted on combined  
776 males and females data but each sex per experiment was presented in a separate  
777 panel according to the coordinates of the two first principal components. In each  
778 panel, 95% confidence ellipses for the two parental species are shown in yellow (*D.*  
779 *sanromea*) and black (*D. yakuba*). Colors refer to F<sub>1</sub> hybrids issued from the cross  
780 between female *yakuba* x male *santomea* (brown), *BCyak*<sup>2016</sup> (turquoise), *BCyak*<sup>2018</sup>  
781 (dark green), *BCyak*<sup>se/D\_2020</sup> (dark blue), *BCyak*<sup>CC\_2020</sup> (light blue), F<sub>1</sub> hybrids issued  
782 from the cross between female *santomea* x male *yakuba* (orange), *BCsan*<sup>2016</sup> (pink)  
783 and *BCsan*<sup>2018</sup> (red). Arrows indicate the trajectory of pigmentation changes in each  
784 panel.

785

786 **Figure 2** – Proportion of *D. santomea* ancestry averaged over 50-kb windows in two  
787 introgressed “light *yakuba*” lines (A) *BCyak-2* and (B) *BCyak-3*. Vertical dotted lines  
788 refer to the location of the five pigmentation genes that were identified in Liu et al.’s  
789 (2019) “dark *santomea*” investigation.

790

791 **Figure 3** – (A-H) Photomicrographs of abdominal pigmentation in males and females  
792 of the parental species, *D. yakuba* and *D. santomea*, and the two introgressed “light  
793 *yakuba*” lines, *BCyak-2* and *BCyak-3*. (I-L) grayscale intensity of females’ abdominal  
794 segments 6 and 7 and males’ abdominal segments 5 and 6. Tukey’s HSD  
795 significance level: \* < 0.05, \*\* < 0.01 and \*\*\* < 0.001.

796

Figure 1

Females

Males

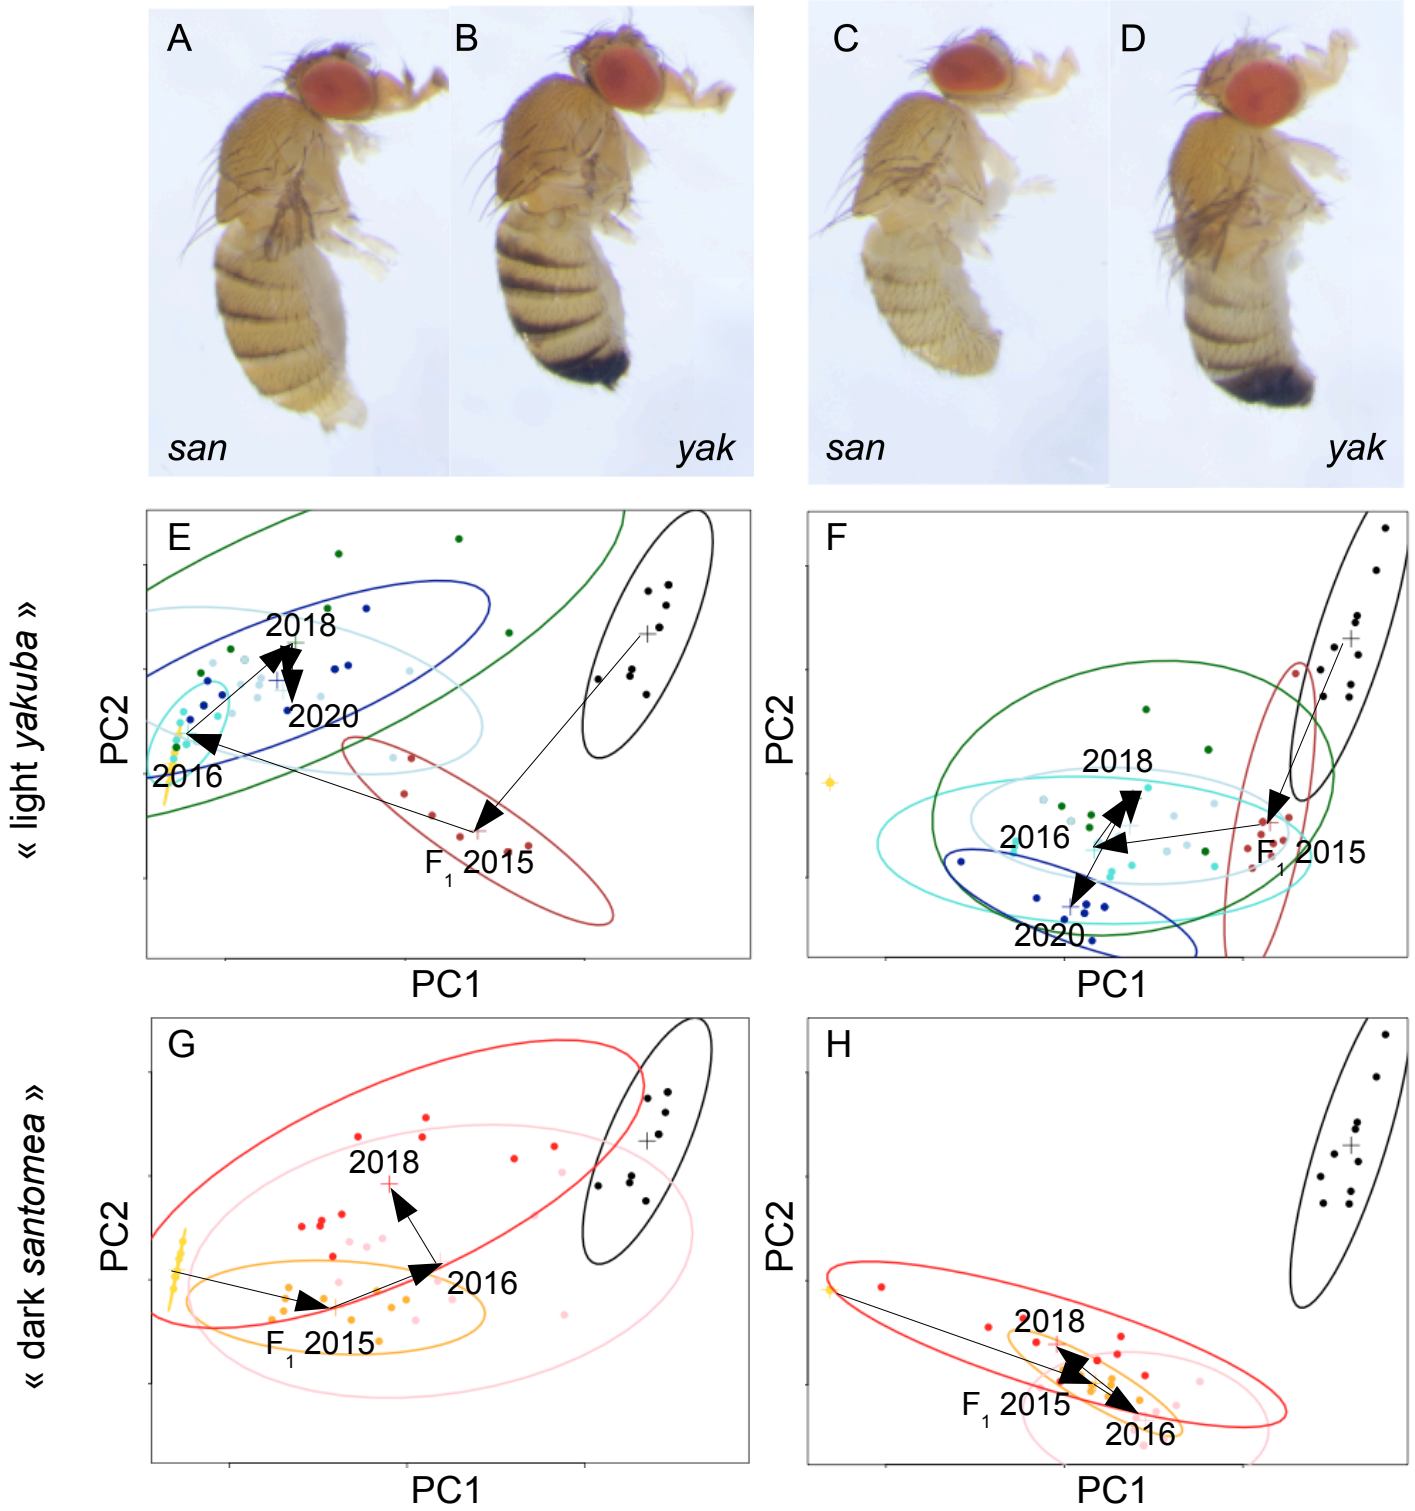



Figure 2

bioRxiv preprint doi: <https://doi.org/10.1101/2022.01.14.476347>; this version posted January 16, 2022. The copyright holder for this preprint (which was not certified by peer review) is the author/funder, who has granted bioRxiv a license to display the preprint in perpetuity. It is made available under aCC-BY-NC-ND 4.0 International license.

A

*BCyak-2*

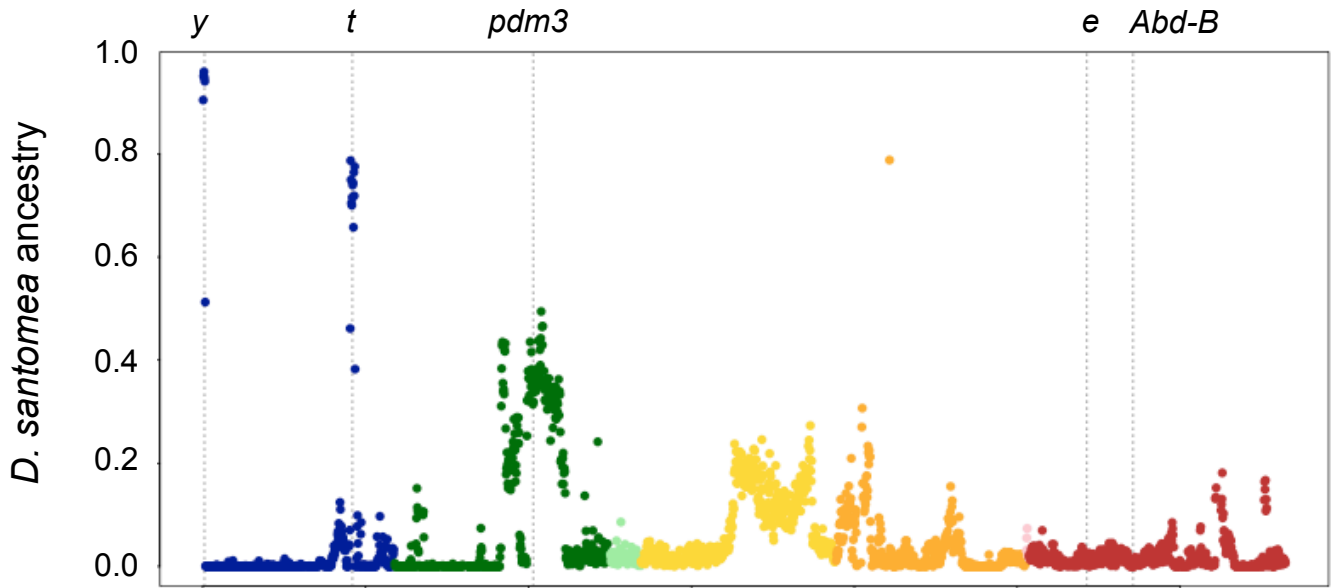

B

*BCyak-3*

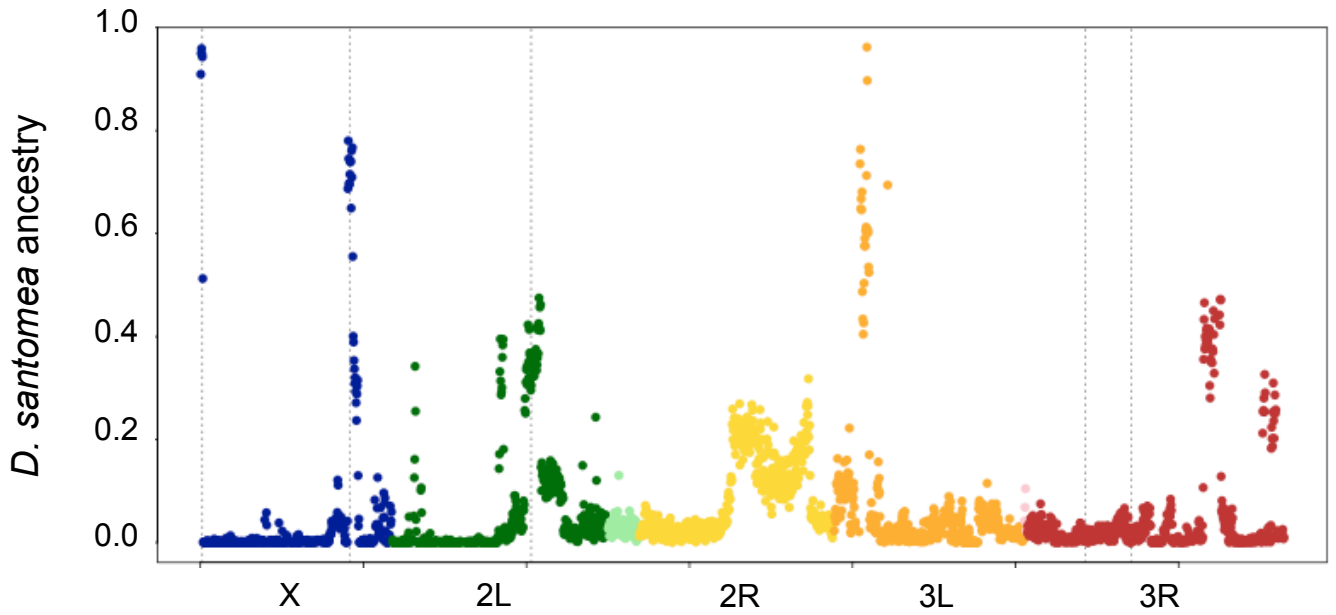

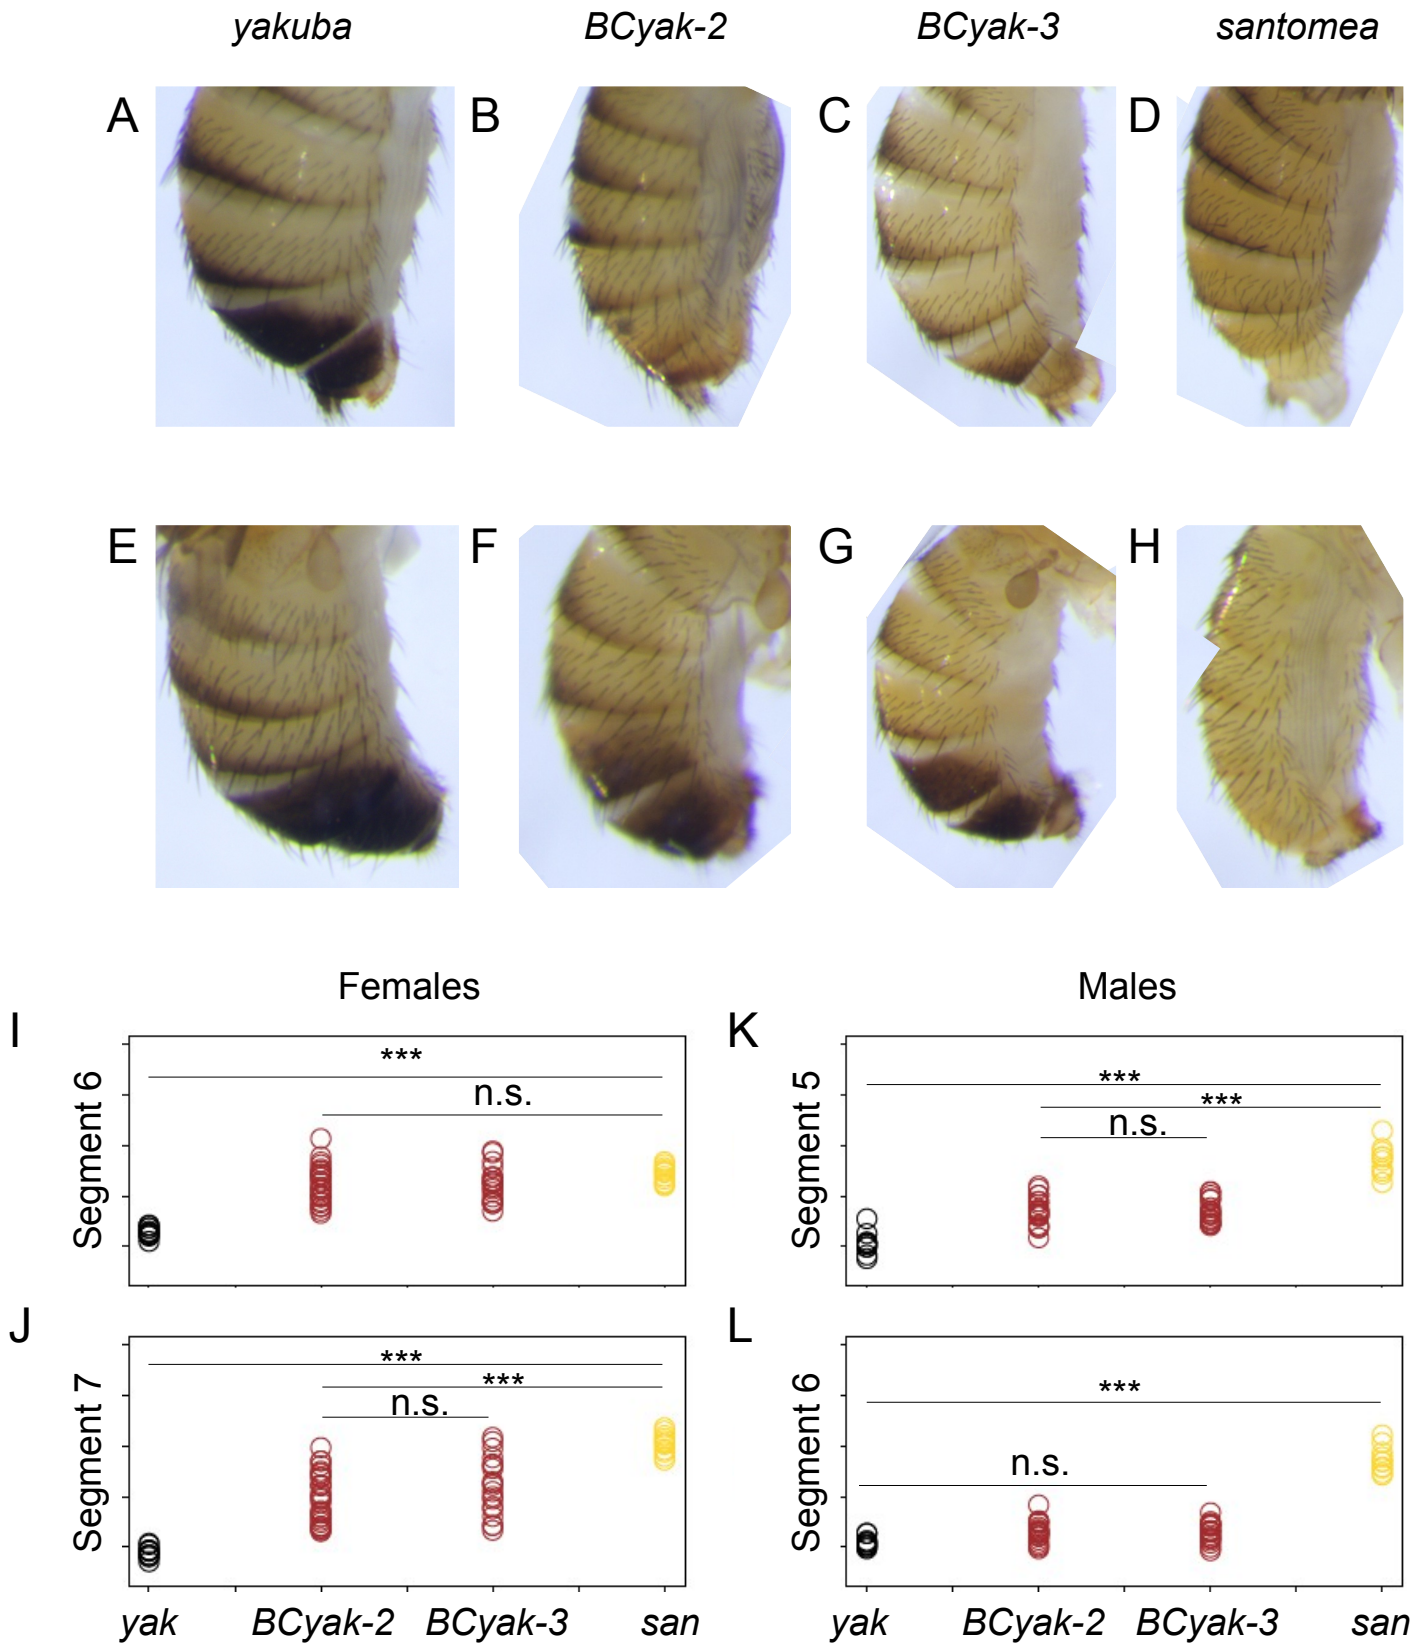

Source: http://biorxiv.org/content/10.1101/2022.01.14.476347v1.full.pdf
